# Supplementary material for: Ligation of the Jugular Veins Does Not Result in Brain Inflammation or Demyelination in Mice
Source: PLoS One. 2012 Mar 21;7(3):e33671. doi: 10.1371/journal.pone.0033671 (PMC3310075; doi:10.1371/journal.pone.0033671)
Supplement: Figure S1 — Gamma scintillation counter using Tc-99m-exametazime. Sham group (n = 4, %IDGT (% injected dose per gram of tissue) = 7.09±0.42), JVL group (n = 4, %IDGT = 8.29±0.11), p = 0.024. (DOCX) [file pone.0033671.s001.docx]

Ligation of the Jugular Veins Does Not Result in Brain Inflammation or Demyelination in Mice

Wendy Atkinson, BS1,*, Reza Forghani, MD, PhD1,2,4,*, Gregory R. Wojtkiewicz, MS1, Benjamin Pulli, MD1, Yoshiko Iwamoto, BS1, Takuya Ueno, MD, PhD1, Peter Waterman, MBA1, Jessica Truelove, BS1, Rahmi Oklu, MD, PhD3, and John W. Chen, MD, PhD1,2

1Center for Systems Biology, Massachusetts General Hospital and Harvard Medical School, Richard B. Simches Research Center, 185 Cambridge Street, Suite 5.210, Boston, MA, USA 02114

2Division of Neuroradiology, Department of Radiology, Massachusetts General Hospital and Harvard Medical School, 55 Fruit St., GRB-285, Boston, MA USA 02114

3Division of Vascular Imaging & Intervention, Department of Radiology, Massachusetts General Hospital and Harvard Medical School, 55 Fruit St., GRB-290A, Boston, MA USA 02114

4Sir Mortimer B. Davis Jewish General Hospital and McGill University, Room C-210.2, 3755 Cote Ste-Catherine Rd, Montreal, Quebec, Canada H3T 1E2

*WA and RF contributed equally.

Fig. S1: Gamma scintillation counter using Tc-99m-exametazime. Sham group (n=4, %IDGT (% injected dose per gram of tissue)=7.09 ± 0.42), JVL group (n=4, %IDGT=8.29 ± 0.11), p=0.024.
